# Supplementary material for: Could Avatar Therapy Enhance Mental Health in Chronic Patients? A Systematic Review
Source: MDPI journal article supplement (doi:10.3390/electronics10182212), 2021-09-09
Supplement: s1 [file s1]

| Study         | 1. Publication year | 2. Country    | 3. Type of study                                                                                                                                                                                                                                                                      | 4. Study aim                                                                                                                                                                                     | 5. Participant number | 6. Mean age   | 7. Chronic diagnosis               |
|---------------|---------------------|---------------|---------------------------------------------------------------------------------------------------------------------------------------------------------------------------------------------------------------------------------------------------------------------------------------|--------------------------------------------------------------------------------------------------------------------------------------------------------------------------------------------------|-----------------------|---------------|------------------------------------|
| Aali et al    | 2020                | England       | Review                                                                                                                                                                                                                                                                                | To examine the effects of avatar therapy for people with schizophrenia or related disorders. Comparing avatar therapy with two other interventions; treatment as usual or supportive counselling | 195                   | Not provided  | Schizophrenia or related disorders |
| Andrade et al | 2015                | United States | 12-week RCT (IG with avatar/CG: No avatar)                                                                                                                                                                                                                                            | To determine whether an avatar-based, online, self-management program is an effective therapeutic approach for women with overactive bladder (OAB).                                              | 41                    | 61 (SD=6)     | Overactive bladder                 |
| Cho et al     | 2020                | United States | Focus groups (5 sessions) after six months RCT completion (IG: An avatar guided users through the app that provided users with self-care strategies with animated videos for ameliorating their symptoms/ CG: An avatar guided users through the app for weekly symptom assessments). | To understand consumers' perspectives on use of a self-management app following completion of a clinical trial that tested the efficacy of the app for improving health outcomes.                | 39                    | 55 (SD=10.70) | HIV with HANA conditions           |
| Clarke et al  | 2019                | Ireland       | Review of 21 articles (K 0.82)                                                                                                                                                                                                                                                        | To complete a clinical trial that tested the efficacy of the app for improving health outcomes.                                                                                                  | 1535                  | Not provided  | Psychosis                          |
| Dang et al    | 2020                | United States | Feasibility study                                                                                                                                                                                                                                                                     | To evaluate patient adherence and the acceptability of an avatar-facilitated life review intervention.                                                                                           | 11                    | Not provided  | Cancer                             |
| du Sert et al | 2018                | Canada        | Seven-week phase-II, randomized partial cross-over trial.                                                                                                                                                                                                                             | To test seven weekly sessions of VR-assisted therapy (VRT) in auditory verbal hallucinations.                                                                                                    | 19                    | 42.9          | Schizophrenia                      |

|                       |      |               |                                                   |                                                                                                                                                                                                                                                                                                                                                 |              |                 |                                                                                                                                               |
|-----------------------|------|---------------|---------------------------------------------------|-------------------------------------------------------------------------------------------------------------------------------------------------------------------------------------------------------------------------------------------------------------------------------------------------------------------------------------------------|--------------|-----------------|-----------------------------------------------------------------------------------------------------------------------------------------------|
| Falconer et al        | 2017 | England       | Feasibility study                                 | To study the feasibility and acceptability of using an avatar adjunct to conventional mentalization-based treatment (avatar-MBT) in the treatment of individuals with borderline personality disorder (BPD).                                                                                                                                    | 11           | 31.2            | Borderline personality disorder                                                                                                               |
| Leff et al            | 2013 | England       | Randomised, single blind, partial crossover trial | To develop a computerised system that enables the patient to create an avatar of their persecutor. To encourage them to engage in a dialogue with the avatar.                                                                                                                                                                                   | 26           | Not provided    | Schizophrenia                                                                                                                                 |
| Pinto et al           | 2013 | United States | Pilot tested                                      | To report preliminary evidence on the efficacy of an avatar based depression self-management intervention among young adults                                                                                                                                                                                                                    | 28           | Not provided    | Depression                                                                                                                                    |
| Robinson-Whelen et al | 2020 | United States | Randomized, controlled feasibility test           | To test the feasibility of an online self-esteem intervention for women with spinal cord injury (SCI).                                                                                                                                                                                                                                          | 21           | Not provided    | Spinal cord injury                                                                                                                            |
| Rus-Calafell et al    | 2020 | England       | Randomised clinical trial                         | To explore the sense of voice presence in a psychological therapy for distressing auditory hallucinations. To explore, for the first time, the contribution of sense of voice presence, along with session-by-session reduction in anxiety and paranoid attributions about the avatar, to changes in primary outcomes following avatar therapy. | 39           | 43,87 (SD=9.33) | Schizophrenia                                                                                                                                 |
| Stewart et al         | 2010 | United States | Narrative review                                  | To test the explicit benefits of Second Life.                                                                                                                                                                                                                                                                                                   | Not provided | Not provided    | People with disabilities (physical, psychological, and cognitive rehabilitation or those who are chronically ill, convalescing, or homebound) |
| Thomas et al          | 2019 | Australia     | Narrative review                                  | To determine the benefits and feasibility of the application of digital technology to hallucinatory experiences with a focus on schizophrenia                                                                                                                                                                                                   | Not provided | Not provided    | Schizophrenia                                                                                                                                 |

|                                                                                            |      |           |                                      |                                                                                                                                                                                                                                                              |     |                |                                                                                    |  |
|--------------------------------------------------------------------------------------------|------|-----------|--------------------------------------|--------------------------------------------------------------------------------------------------------------------------------------------------------------------------------------------------------------------------------------------------------------|-----|----------------|------------------------------------------------------------------------------------|--|
| Tong et al                                                                                 | 2020 | China     | Case series                          | To examine the long-term effects of virtual reality-based mirror therapy interventions on alleviating phantom limb pain and the accompanying changes in the motor imagery capacity involving the phantom limb.                                               | 5   | 50,2 (SD=7.73) | Phantom limb pain (brachial plexus avulsion injury and amputees' outpatients)      |  |
| Tongpeth et al                                                                             | 2018 | Australia | Feasibility pilot testing            | To develop and evaluate an interactive, avatar-based education application for improving patients' knowledge of, and response to, acute coronary syndrome (ACS) symptoms.                                                                                    | 10  | 52.2 (SD=10.4) | Acute coronary syndrome                                                            |  |
| Triberti et al                                                                             | 2019 | Italy     | Pilot testing                        | To test how breast cancer affects avatar-conveyed multiple representations (actual self, their ideal self, and their self connected to the disease experience). To explore the relation between user-customized avatars and anxiety and depression symptoms. | 22  | 49,4 (SD=7.73) | Cancer                                                                             |  |
| Wonggom et al                                                                              | 2019 | Australia | Review (9 articles (from 8 studies)) | To examine the effectiveness of patient education using avatar-based technology on knowledge and self-care behaviours in patients with chronic disease.                                                                                                      | 752 | Not provided   | Chronic disease (cardiovascular and chronic respiratory disease, diabetes, cancer) |  |
| Wonggom et al                                                                              | 2020 | Australia | RCT                                  | To evaluate the effectiveness of education using avatars for improving patients' heart failure knowledge and self-care.                                                                                                                                      | 36  | 67,5 (SD=11.3) | Heart failure                                                                      |  |
| Note<br>RCT: randomized controlled trial.                                                  |      |           |                                      |                                                                                                                                                                                                                                                              |     |                |                                                                                    |  |
| IC: Treatment Group.                                                                       |      |           |                                      |                                                                                                                                                                                                                                                              |     |                |                                                                                    |  |
| CG: Control Group                                                                          |      |           |                                      |                                                                                                                                                                                                                                                              |     |                |                                                                                    |  |
|                                                                                            |      |           |                                      |                                                                                                                                                                                                                                                              |     |                |                                                                                    |  |
|                                                                                            |      |           |                                      |                                                                                                                                                                                                                                                              |     |                |                                                                                    |  |
| ACS Response Index: attitudes and beliefs about heart attack symptoms and response         |      |           |                                      |                                                                                                                                                                                                                                                              |     |                |                                                                                    |  |
| BAVQ-R: Revised Beliefs About Voices Questionnaire - Omnipotence and Malevolence subscales |      |           |                                      |                                                                                                                                                                                                                                                              |     |                |                                                                                    |  |
| BDI-II: Beck Depression Inventory-II                                                       |      |           |                                      |                                                                                                                                                                                                                                                              |     |                |                                                                                    |  |
| CDS: Calgary Depression Scale                                                              |      |           |                                      |                                                                                                                                                                                                                                                              |     |                |                                                                                    |  |

|                                                                                                                 |  |  |  |  |  |  |
|-----------------------------------------------------------------------------------------------------------------|--|--|--|--|--|--|
| CESD-10: Center for Epidemiological Studies Depression Scale-10                                                 |  |  |  |  |  |  |
| DASS-21: Depression, Anxiety and Stress Scale - 21 Items                                                        |  |  |  |  |  |  |
| DES-SF: Diabetes Empowerment Scale-Short Form                                                                   |  |  |  |  |  |  |
| DHFKS: Dutch HF knowledge scale                                                                                 |  |  |  |  |  |  |
| DSMQ: Diabetes Self-management Profile Questionnaire                                                            |  |  |  |  |  |  |
| EORTC QLQ-C30: European Organization for Research and Treatment of Cancer-Quality of Life Questionnaire Core 30 |  |  |  |  |  |  |
| ESAS: Edmonton Symptom Assessment Sytem                                                                         |  |  |  |  |  |  |
| EuroQol (EQ-5D): European Quality of Life-5 Dimensions                                                          |  |  |  |  |  |  |
| FACIT-Sp: Functional Assessment of Chronic Illness Therapy-Spiritual Well-Being Scale                           |  |  |  |  |  |  |
| GAD-7: Anxiety will be assessed with Generalized Anxiety Disorder                                               |  |  |  |  |  |  |
| GSEI-UI: Geriatric Self-efficacy Index for Urinary Incontinence                                                 |  |  |  |  |  |  |
| GSES: Generalized Self-Efficacy Scale                                                                           |  |  |  |  |  |  |
| HAD-S: Hospital Anxiety and Depression Scale                                                                    |  |  |  |  |  |  |
| HPLP-IR: Health Promoting Lifestyle Profile Interpersonal Relations                                             |  |  |  |  |  |  |
| HPLP-SG: Health Promoting Lifestyle Spiritual Growth/Self-Actualization                                         |  |  |  |  |  |  |
| HPLP-SM: Health Promoting Lifestyle Profile Stress Management                                                   |  |  |  |  |  |  |
| MANSA: Manchester Short Assessment of Quality of Life                                                           |  |  |  |  |  |  |
| MEMS: Medication Event Monitoring System                                                                        |  |  |  |  |  |  |
| MMAS: Medication Adherence Scale                                                                                |  |  |  |  |  |  |
| MoCA: Montreal cognitive assessment                                                                             |  |  |  |  |  |  |
| MOS-SS-EI: MOS-Social Support Emotional-Informational Support                                                   |  |  |  |  |  |  |
| MZQ: Mentalization Questionnaire                                                                                |  |  |  |  |  |  |

|                                                                                 |  |  |  |  |  |  |  |
|---------------------------------------------------------------------------------|--|--|--|--|--|--|--|
| NRS: Numerical Rating Scale                                                     |  |  |  |  |  |  |  |
| OABq: Overactive bladder questionnaire                                          |  |  |  |  |  |  |  |
| PANSS: Positive and Negative Syndrome Scale                                     |  |  |  |  |  |  |  |
| PCQ: PedCarbQuiz                                                                |  |  |  |  |  |  |  |
| PedsQL: Pediatric Quality of Life Inventory                                     |  |  |  |  |  |  |  |
| PHQ-9: Patient Health Questionnaire-9                                           |  |  |  |  |  |  |  |
| PPBC: patient perception of bladder condition                                   |  |  |  |  |  |  |  |
| PRIME: personalized real-time intervention for motivational enhancement         |  |  |  |  |  |  |  |
| PSRS: Perceived Stress Reactivity Scale                                         |  |  |  |  |  |  |  |
| PSYRATS: Psychotic Symptom Rating Scale                                         |  |  |  |  |  |  |  |
| PSYRATS-AH: Psychotic Symptom Rating Scales—Auditory Hallucinations,            |  |  |  |  |  |  |  |
| Q-LES-Q-SF: Quality of Life Enjoyment and Satisfaction Questionnaire-Short Form |  |  |  |  |  |  |  |
| REALM-SF: Rapid Estimate of Adult Literacy in Medicine—Short Form               |  |  |  |  |  |  |  |
| RSES: Rosenberg Self- Esteem Scale                                              |  |  |  |  |  |  |  |
| SANS: Scale for Assessment of Negative Symptoms)                                |  |  |  |  |  |  |  |
| SAPS: Simplified Acute Physiology Score                                         |  |  |  |  |  |  |  |
| SCHFI: Self-care of Heart Failure Index                                         |  |  |  |  |  |  |  |
| SDSCA: Summary of Diabetes Self-Care Activities                                 |  |  |  |  |  |  |  |
| SF-MPQ: Short-Form McGill Pain Questionnaire                                    |  |  |  |  |  |  |  |
| SoA: Sense of Agency                                                            |  |  |  |  |  |  |  |
| SoO: Sense of Ownership                                                         |  |  |  |  |  |  |  |
| SSES: Self-efficacy Scale                                                       |  |  |  |  |  |  |  |
| SSPS: State Social Paranoia Scale                                               |  |  |  |  |  |  |  |

|                                                             |  |  |  |  |  |  |
|-------------------------------------------------------------|--|--|--|--|--|--|
| SSPS: State Social Paranoia Scale                           |  |  |  |  |  |  |
| STOFHLA: Short Test of Functional Health literacy in Adults |  |  |  |  |  |  |
| SUS: Sense of Presence Scale                                |  |  |  |  |  |  |
| VAS: Visual Analog Scale                                    |  |  |  |  |  |  |

| Study         | 8. Type of avatar                             | 9. Identification                                                                                             | 10. Device                                                                                                | 11. Variables/Instruments                                                                                                                                                                                                                                                                   | 12. Additional information                                                                                                                   | 13. Results                                                                                                             | 14. Statistical methods                                                                                                                                                                              | 15. Effectiveness | 16. Patients satisfaction |
|---------------|-----------------------------------------------|---------------------------------------------------------------------------------------------------------------|-----------------------------------------------------------------------------------------------------------|---------------------------------------------------------------------------------------------------------------------------------------------------------------------------------------------------------------------------------------------------------------------------------------------|----------------------------------------------------------------------------------------------------------------------------------------------|-------------------------------------------------------------------------------------------------------------------------|------------------------------------------------------------------------------------------------------------------------------------------------------------------------------------------------------|-------------------|---------------------------|
| Aali et al    | Virtual representation (F2F with symptoms)    | Low                                                                                                           | Created a computerised representation of the entity that they believed was the source of their main voice | Clinically important change in; mental state (PANSS, BAVQ-R, PSYRATS, CDS, DASS-21, SAPSS, SANS, PSRS), insight (BAVQ-R, RSES), global state, quality of life (QLESQ-SF, MANSA)                                                                                                             | Review: three trials (1) avatar therapy. (2,3) Compared avatar therapy with treatment as usual.                                              | There is no clear evidence for (or against) using avatar therapy as a treatment for people with serious mental illness. | Descriptive statistics, Chi-square analysis and fixed-effect model                                                                                                                                   | Low               | Not applicable            |
| Andrade et al | Graphic representation (virtual health coach) | 2 avatar coaches: a generic avatar coach (GAC) with low ID and a self-avatar "peer" mentor (SAP) with high ID | Online self management program                                                                            | OAB-related QOL (OABq), Perception of Bladder Condition (PPBC- single-item, 6-point rating scale of participants subjective assessment of their bladder symptoms), OAB Symptoms (daily bladder diaries), self efficacy (GSEI-UI), and avatar Recognition ("Who did the avatar look like?"). | Pre-post: Participants completed daily bladder diaries throughout the 12-week period and OAB related outcome measures at weeks 1, 6, and 12. | IC significantly improved OAB-related QOL ( $P < .05$ ), and reduced their intake of caffeine ( $P < .05$ ).            | Chi-square analysis for categorical variables and independent sample t test comparisons for continuous variables, analysis of covariance (ANCOVA) and repeated measures analysis of variance (ANOVA) | Yes               | Not applicable            |
| Cho et al     | Graphic representation (virtual health coach) | High                                                                                                          | Not applicable                                                                                            | Perceived usefulness, Perceived ease of use (Audio recordings from the focus groups were transcribed).                                                                                                                                                                                      | Five focus group sessions followed by completion of the study trial/once per month.                                                          | IC reported perceived usefulness and perceived ease of use.                                                             | Descriptive statistics (frequencies and percentages)                                                                                                                                                 | Yes               | Yes                       |

|                |                                                                                 |      |                                                                                               |                                                                                                                                                                             |                                                                                |                                                                                                                                                                                      |                                                                                                                                                        |     |                |
|----------------|---------------------------------------------------------------------------------|------|-----------------------------------------------------------------------------------------------|-----------------------------------------------------------------------------------------------------------------------------------------------------------------------------|--------------------------------------------------------------------------------|--------------------------------------------------------------------------------------------------------------------------------------------------------------------------------------|--------------------------------------------------------------------------------------------------------------------------------------------------------|-----|----------------|
| Clarke et al   | Virtual representation (F2F with symptoms)                                      | Low  | avatar therapy (n=4), phone apps (n=3), computer-assisted cognitive remediation (CACR) (n=14) | Cognitive remediation, effectiveness, ameliorating psychotic symptoms such as hallucinations (PRIME, FOCUS, Actissit, PANSS, PSYRATS)                                       | Review 21 articles                                                             | CACR has no impact on psychotic symptoms, whilst web-based CBTp programs and phone apps such as Actissit may hold potential, and avatar-based therapies appear to hold most promise. | Descriptive statistics (mean, standard deviation), test for overall effect (Z), heterogeneity (Tau square, Chi square, df, I square) and meta-analysis | Low | Not applicable |
| Dang et al     | Embodiment/immersive environments                                               | High | Motion capture system and headset.                                                            | Global health (ESAS), spiritual well-being (FACIT-Sp), quality of life (EORTC QLQ-C30)                                                                                      | Baseline and follow-up                                                         | Improvements only in FACIT-Sp.                                                                                                                                                       | Descriptive statistics (mean and standard deviation)                                                                                                   | No  | Yes            |
| du Sert et al  | Embodiment/immersive environment and virtual representation (F2F with symptoms) | Both | Samsung GearVR head mounted display and Samsung Galaxy S6 smartphone.                         | AVH symptoms (PSYRATS), beliefs about voices (BAVQ-R), depressive symptoms (BDI-II), quality of life (Q-LES-Q-SF), distress and anxiety symptoms (PANSS)                    | seven weeks of VRT and three months of follow-up                               | VRT produced significant improvements in AVH severity, depressive symptoms, and quality of life that remained stable at the three-month follow-up.                                   | Linear mixed-effects model                                                                                                                             | Yes | Not applicable |
| Falconer et al | Virtual environment                                                             | Low  | Desktop VR software                                                                           | Self-report measures of mentalization, perspective-taking function and reflective functioning, attentional focus (MZQ), mood (DASS-21)                                      | Four group sessions of avatar-MBT at weekly intervals.                         |                                                                                                                                                                                      | Descriptive statistics (mean, standard deviation) and repeated measures analysis of variance (ANOVA)                                                   | No  | Yes            |
| Leff et al     | Virtual representation (F2F with symptoms)                                      | Low  | Computerised system                                                                           | Psychotic Symptom Rating Scale (PSYRATS), Omnipotence and Malevolence subscales of the Revised Beliefs About Voices Questionnaire (BAVQ-R); Calgary Depression Scale (CDS). | Six sessions of 30 min duration with, posttreatment and three-month follow-up. | Mean reductions in the total PSYRATS score (auditory hallucinations) of 8.75 ( $P = 0.003$ ) and in the BAVQ-R combined score of omnipotence and malevolence of the voices           | Repeated measures analysis of variance (ANOVA), one-sample t-test comparisons, paired t-tests comparisons, and independent-sample t-test comparisons   | Yes | Not applicable |

|                       |                                               |                |                                   |                                                                                                                                                                                                                                                                              |                                         |                                                                                                                                                                                                                                         |                                                                                                        |     |                             |
|-----------------------|-----------------------------------------------|----------------|-----------------------------------|------------------------------------------------------------------------------------------------------------------------------------------------------------------------------------------------------------------------------------------------------------------------------|-----------------------------------------|-----------------------------------------------------------------------------------------------------------------------------------------------------------------------------------------------------------------------------------------|--------------------------------------------------------------------------------------------------------|-----|-----------------------------|
| Pinto et al           | Graphic representation (virtual health coach) | Low            | Screen-based                      | Depression self-management (HAD-S)                                                                                                                                                                                                                                           | Baseline, four weeks, and eight weeks   | Participants who received eSMART-MH showed a statistically significant reduction in their depressive symptoms over the three-month study.                                                                                               | Descriptive statistics and repeated measures analysis of variance (RMANOVA)                            | Yes | Not applicable              |
| Robinson-Whelen et al | Virtual environment                           | Not applicable | Online virtual world (computer)   | Health promoting behaviours (HPLP-IR, HPLP-SM, HPLP-SG), social support (MOS-SS-EI), self-efficacy (GSES), self-esteem (RSES), depression (CESD-10, PHQ-9)                                                                                                                   | Post-test via telephone interview       | Intervention participants experienced significantly greater change than controls on two measures of health-promoting behaviour (health promoting lifestyle profile-ii spiritual growth/self-actualization and interpersonal relations). | Multiple linear regression analyses and paired t-tests comparisons                                     | Yes | Yes                         |
| Rus-Calafell et al    | Virtual representation (F2F with symptoms)    | Low            | Not applicable                    | Psychotic Symptom Rating Scales (PSYRATS-AH); Beliefs about Voices Questionnaire (BAVQ-R); thoughts in relation to the virtual agents during the experience of a virtual environment (SSPS); Sense of presence (SUS), anxiety experienced in dialogue with the avatar (VAS). | At baseline, 12- and 24-week follow-up. |                                                                                                                                                                                                                                         | Descriptive analyses, repeated measures t-test differences comparisons and multiple linear regressions | Yes | Not applicable              |
| Stewart et al         | Virtual environment                           | Not applicable | The virtual world of Second Life® | Not applicable                                                                                                                                                                                                                                                               | Statement                               | -                                                                                                                                                                                                                                       | Not applicable                                                                                         | -   | Yes (not measure, feedback) |
| Thomas et al          | Several types of avatars                      | Not applicable | Not applicable                    | Coping hallucinations in schizophrenia                                                                                                                                                                                                                                       | Review literature                       | The application of digital technology to hallucinatory experiences is at a very early stage, but emergent technologies offer significant potential to target the perceptual, verbal, and person-like characteristics of hallucination.  | Not applicable                                                                                         | -   | Not applicable              |

|                |                                               |                |                                         |                                                                                                                                                                                                                                                                                                                 |                                                                                                                                    |                                                                                                                                                                                                                                                                                                                                                                        |                                                                                 |                |                |
|----------------|-----------------------------------------------|----------------|-----------------------------------------|-----------------------------------------------------------------------------------------------------------------------------------------------------------------------------------------------------------------------------------------------------------------------------------------------------------------|------------------------------------------------------------------------------------------------------------------------------------|------------------------------------------------------------------------------------------------------------------------------------------------------------------------------------------------------------------------------------------------------------------------------------------------------------------------------------------------------------------------|---------------------------------------------------------------------------------|----------------|----------------|
| Tong et al     | Embodiment/immersive environments             | High           | Immersive room-scale VR through headset | Pain rating (SF-MPQ); Pain (VAS); Sense of embodiment (SoO and SoA); depression and anxiety levels (HADS)                                                                                                                                                                                                       | Before and after the VR intervention.                                                                                              | A significant improvement in pain rating in the third session compared to the first session. Improvement in anxiety and/or depression levels.                                                                                                                                                                                                                          | Descriptive statistics (mean, standard deviation) and Wilcoxon signed-rank test | Yes            | Not applicable |
| Tongpeth et al | Graphic representation (virtual health coach) | Low            | App                                     | Patients' knowledge, attitudes, and beliefs about heart attack symptoms and response (ACS Response Index); participants' satisfaction with the avatar-based education (avatar-based education app satisfaction questionnaire) app.                                                                              | Before and after using the app                                                                                                     | Increase in knowledge scores was found as well as patient satisfaction after using the app.                                                                                                                                                                                                                                                                            | Descriptive statistics (means, standard deviation, frequencies and percentages) | Yes            | Yes            |
| Triberti et al | Graphic representation                        | High           | App - Android mobile device             | Participants' attitudes (attractiveness, representativeness, difficulty in customization; emotional intensity, pleasantness, and dominance) toward their three avatars (1–7 Likert scale); Depression symptoms (PHQ-9), anxiety symptoms (GAD-7).                                                               | After using the app                                                                                                                | Depression and anxiety seem inversely related to positive attitudes (pleasantness, intensity, and attractiveness) toward the avatars representing patient's actual self.                                                                                                                                                                                               | Multivariate analysis of variance and paired-sample t test comparisons          | Not applicable | Not applicable |
| Wonggom et al  | Several types of avatars                      | Not applicable | Tablet computer, desktop computer       | Illness knowledge (DES-SF, SDSCA, PCQ, DSMQ, Modified Heart Failure Knowledge questionnaire, Chronic Disease Compliance Instrument, Assessment of Diabetes Knowledge), self-care behaviours (Self-Care Heart Failure Index), self-efficacy (SES, Cognitive interview), quality of life (EuroQol:EQ-5D, PedsQL), | Two RCTs, one pilot randomized controlled trial, four single group pre-post-test studies, one prospective multi-centre pilot study | avatar-based technology in patient education can have a positive effect on a wide range of healthcare outcomes compared to usual care. Can improve knowledge, self-care behaviours and self-efficacy in patients with chronic conditions. There is limited evidence on improvement in HqoL and adherence to medication, and no evidence of effectiveness of using this | Mean differences IG-CG. No meta-analysis                                        | Yes            | Yes            |

|               |                                               |     |                       |                                                                                                                                                                                                                                                                                        |                                                                                                                  |                                                                                                                          |                                                                                                                                                                                                                                                  |     |     |
|---------------|-----------------------------------------------|-----|-----------------------|----------------------------------------------------------------------------------------------------------------------------------------------------------------------------------------------------------------------------------------------------------------------------------------|------------------------------------------------------------------------------------------------------------------|--------------------------------------------------------------------------------------------------------------------------|--------------------------------------------------------------------------------------------------------------------------------------------------------------------------------------------------------------------------------------------------|-----|-----|
|               |                                               |     |                       | readmission and adherence to medication (MMAS, MEMS)                                                                                                                                                                                                                                   |                                                                                                                  | education technology on readmission.                                                                                     |                                                                                                                                                                                                                                                  |     |     |
| Wonggom et al | Graphic representation (virtual health coach) | Low | App - tablet computer | Heart Failure-specific knowledge (DHFKS), HF self-care behaviours, HF-related readmission and satisfaction, Montreal cognitive assessment (MoCA), Rapid Estimate of Adult Literacy in Medicine—Short Form (REALM-SF) and Short Test of Functional Health literacy in Adults (STOFHLA). | Baseline using medical record review and face-to-face interview and by telephone at 30-day and 90-day follow-up. | The addition of the avatar app is effective in improving HF knowledge and self-care behaviours compared with usual care. | Descriptive statistics (mean, standard deviation, percentage), independent sample t-test comparisons, Mann–Whitney U tests, Chi squared or Fisher's exact tests, analysis of covariance (ANCOVA) and bivariate exact binary logistic regressions | Yes | Yes |
