# Supplementary material for: Could Avatar Therapy Enhance Mental Health in Chronic Patients? A Systematic Review
Source: MDPI journal article supplement (doi:10.3390/electronics10182212), 2021-09-09
Supplement: s1 [file s1]

### Multimedia Appendix 3: Risk-of-bias assessment (based upon the CONSORT checklist [1])

This is a Multimedia Appendix to a full manuscript published in the Electronics. For full copyright and citation information see <http://dx.doi.org/XXXXXXX>

|                                                                                                                                                                                             | Aali et al<br>(2020) | Andrade et<br>al (2015) | Cho et al<br>(2020) | Clarke et<br>al (2019) | Dang et<br>al (2020) | du Sert et al<br>(2018) | Falconer et<br>al (2017) | Leff et al<br>(2013) | Pinto et<br>al (2013) | Robinson-<br>Whelen et al<br>(2020) | Rus-<br>Calafell<br>et al<br>(2020) | Stewart<br>et al<br>(2010) | Thomas et<br>al (2019) | Tong et al<br>(2020) | Tongpeth et<br>al (2018) | Triberti<br>et al<br>(2019) | Wonggom<br>et al<br>(2019) | Wonggom<br>et al<br>(2020) |
|---------------------------------------------------------------------------------------------------------------------------------------------------------------------------------------------|----------------------|-------------------------|---------------------|------------------------|----------------------|-------------------------|--------------------------|----------------------|-----------------------|-------------------------------------|-------------------------------------|----------------------------|------------------------|----------------------|--------------------------|-----------------------------|----------------------------|----------------------------|
| <b>1. Title and Abstract</b>                                                                                                                                                                |                      |                         |                     |                        |                      |                         |                          |                      |                       |                                     |                                     |                            |                        |                      |                          |                             |                            |                            |
| a. identification as a randomized trial in title                                                                                                                                            | 0                    | 1                       | 0                   | 0                      | 0                    | 0.5                     | 0                        | 0                    | 0                     | 0                                   | 0                                   | 0                          | 0                      | 0                    | 0                        | 0                           | 0                          | 1                          |
| b. structured summary of trial design, methods, results, and conclusions                                                                                                                    | 1                    | 1                       | 0.75                | 1                      | 0.5                  | 0.75                    | 0.25                     | 1                    | 0.75                  | 0.25                                | 0.5                                 | 0                          | 0                      | 0                    | 0                        | 0                           | 1                          | 0.75                       |
| <b>2. Introduction</b>                                                                                                                                                                      |                      |                         |                     |                        |                      |                         |                          |                      |                       |                                     |                                     |                            |                        |                      |                          |                             |                            |                            |
| a. scientific background and explanation of rationale                                                                                                                                       | 1                    | 1                       | 1                   | 1                      | 1                    | 0.75                    | 0.75                     | 1                    | 1                     | 0.25                                | 1                                   | 1                          | 1                      | 0.75                 | 1                        | 0.25                        | 1                          | 0.75                       |
| b. specific objectives or hypotheses                                                                                                                                                        | 1                    | 0.75                    | 1                   | 1                      | 0.75                 | 0.75                    | 0.75                     | 1                    | 1                     | 0.25                                | 1                                   | 1                          | 1                      | 1                    | 1                        |                             | 1                          | 0.75                       |
| <b>3. Trial design</b>                                                                                                                                                                      |                      |                         |                     |                        |                      |                         |                          |                      |                       |                                     |                                     |                            |                        |                      |                          |                             |                            |                            |
| a. description of trial design                                                                                                                                                              | 0                    | 1                       | 0.75                | 0                      | 0                    | 0.75                    | 0                        | 1                    | 0.75                  | 0.75                                | 1                                   | 0                          | 0                      | 0                    | 0                        | 0                           | 0                          | 0.75                       |
| b. important changes to methods after trial commencement (such as eligibility criteria), with reasons                                                                                       | 0                    | 0.25                    | 0.25                | 0                      | 0                    | 0                       | 0                        | 0.75                 | 0                     | 0.75                                | 0.75                                | 0                          | 0                      | 0                    | 0                        | 0                           | 0                          | 1                          |
| <b>4. Participants</b>                                                                                                                                                                      |                      |                         |                     |                        |                      |                         |                          |                      |                       |                                     |                                     |                            |                        |                      |                          |                             |                            |                            |
| a. eligibility criteria for participants                                                                                                                                                    | 1                    | 1                       | 0.25                | 1                      | 1                    | 1                       | 0.75                     | 1                    | 1                     | 1                                   | 1                                   | 0                          | 0                      | 1                    | 0.75                     | 0.25                        | 1                          | 1                          |
| b. settings and locations where the data were collected                                                                                                                                     | 0                    | 0.75                    | 0.25                | 0                      | 0.75                 | 0.75                    | 0.75                     | 0.25                 | 1                     | 1                                   | 0.75                                | 0                          | 0                      | 1                    | 0.25                     | 0.75                        | 1                          | 1                          |
| <b>5. Interventions</b>                                                                                                                                                                     |                      |                         |                     |                        |                      |                         |                          |                      |                       |                                     |                                     |                            |                        |                      |                          |                             |                            |                            |
| Descriptions with sufficient details to allow replication, including how and when they were actually administered                                                                           | 1                    | 0.75                    | 0.5                 | 0                      | 0.75                 | 0.75                    | 0.75                     | 0.75                 | 0.75                  | 0.75                                | 0.75                                | 0                          | 0                      | 0.75                 | 0.75                     | 0.25                        | 1                          | 0.75                       |
| <b>6. Outcomes</b>                                                                                                                                                                          |                      |                         |                     |                        |                      |                         |                          |                      |                       |                                     |                                     |                            |                        |                      |                          |                             |                            |                            |
| a. pre-specified primary and secondary outcome measures, including how and when they were assessed                                                                                          | 1                    | 1                       | 0.75                | 0                      | 0.75                 | 0.75                    | 0.25                     | 0.75                 | 0.25                  | 1                                   | 1                                   | 0                          | 0                      | 0.75                 | 1                        | 0.25                        | 1                          | 1                          |
| b. any changes to trial outcomes after the trial commenced, with reasons                                                                                                                    | 0                    | 0.25                    | 0                   | 0                      | 0                    | 0.25                    | 0                        | 1                    | 0                     | 1                                   | 0                                   | 0                          | 0                      | 0                    | 0                        | 0                           | 0                          | 1                          |
| <b>7. Sample size</b>                                                                                                                                                                       |                      |                         |                     |                        |                      |                         |                          |                      |                       |                                     |                                     |                            |                        |                      |                          |                             |                            |                            |
| a. how sample size was determined                                                                                                                                                           | 0                    | 1                       | 0                   | 0                      | 0                    | 0                       | 0                        | 1                    | 0                     | 0.75                                | 0                                   | 0                          | 0                      | 0                    | 0                        | 0                           | 0                          | 1                          |
| b. when applicable, explanation of any interim analyses and stopping guidelines                                                                                                             | 0                    | 1                       | 0                   | 0                      | 0                    | 0                       | 0                        | 1                    | 0                     | 0.75                                | 0.25                                | 0                          | 0                      | 0                    | 0                        | 0                           | 0                          | 1                          |
| <b>8. Randomisation - sequence generation</b>                                                                                                                                               |                      |                         |                     |                        |                      |                         |                          |                      |                       |                                     |                                     |                            |                        |                      |                          |                             |                            |                            |
| a. method used to generate the random allocation sequence                                                                                                                                   | 0                    | 1                       | 0                   | 0                      | 0                    | 0.25                    | 0                        | 1                    | 0                     | 0.5                                 | 0                                   | 0                          | 0                      | 0                    | 0                        | 0                           | 0                          | 1                          |
| b. type of randomisation including details of any restriction                                                                                                                               | 0                    | 1                       | 0                   | 0                      | 0                    | 0                       | 0                        | 1                    | 0                     | 0.25                                | 0                                   | 0                          | 0                      | 0                    | 0                        | 0                           | 0                          | 1                          |
| <b>9. Allocation concealment mechanism</b>                                                                                                                                                  |                      |                         |                     |                        |                      |                         |                          |                      |                       |                                     |                                     |                            |                        |                      |                          |                             |                            |                            |
| Mechanism used to implement the random allocation sequence (such as sequentially numbered containers), describing any steps taken to conceal the sequence until interventions were assigned | 0                    | 0.75                    | 0                   | 0                      | 0                    | 0                       | 0                        | 0.75                 | 0                     | 0.25                                | 0                                   | 0                          | 0                      | 0                    | 0                        | 0                           | 0                          | 0.25                       |
| <b>10. Implementation</b>                                                                                                                                                                   |                      |                         |                     |                        |                      |                         |                          |                      |                       |                                     |                                     |                            |                        |                      |                          |                             |                            |                            |
| Who generated the random allocation sequence, who enrolled participants,                                                                                                                    | 0                    | 1                       | 0                   | 0                      | 0                    | 0                       | 0                        |                      |                       | 0.5                                 | 0                                   | 0                          | 0                      | 0                    | 0                        | 0                           | 0                          | 0                          |

|                                                                                                                                                                                                                                                                                              |        |           |           |        |              |              |              |              |              |              |           |        |        |           |           |              |        |        |
|----------------------------------------------------------------------------------------------------------------------------------------------------------------------------------------------------------------------------------------------------------------------------------------------|--------|-----------|-----------|--------|--------------|--------------|--------------|--------------|--------------|--------------|-----------|--------|--------|-----------|-----------|--------------|--------|--------|
| and who assigned participants to interventions                                                                                                                                                                                                                                               |        |           |           |        |              |              |              |              |              |              |           |        |        |           |           |              |        |        |
| <b>11. Blinding</b><br>a. if done, who was blinded after assignment to interventions and how<br>b. if relevant, description of the similarity of interventions                                                                                                                               | 0<br>0 | 0.75<br>1 | 0<br>0    | 0<br>0 | 0<br>0       | 0<br>0       | 0<br>0       | 0<br>0       | 0<br>0       | 0.25<br>0.25 | 1<br>0    | 0<br>0 | 0<br>0 | 0<br>0    | 0<br>0    | 0<br>0       | 0<br>0 | 0<br>1 |
| <b>12. Statistical methods</b><br>a. statistical methods used for (primary and secondary) outcomes<br>b. methods for additional analyses, such as subgroup analyses and adjusted analyses                                                                                                    | 0<br>0 | 1<br>1    | 0.75<br>0 | 0<br>0 | 0.75<br>0    | 0.75<br>0.75 | 0.75<br>0.25 | 1<br>1       | 0.75<br>0.25 | 1<br>1       | 1<br>1    | 0<br>0 | 0<br>0 | 0.5<br>0  | 0.75<br>0 | 0.75<br>0.75 | 0<br>0 | 1<br>1 |
| <b>13. Participant flow</b><br>a. for each group, the numbers of participants who were randomly assigned, received intended treatment, and were analyzed for the primary outcome<br>b. for each group, losses and exclusions after randomization, together with reasons                      | 1<br>1 | 1<br>0.75 | 0<br>0    | 1<br>1 | 0.75<br>0.75 | 0<br>0       | 0<br>0       | 1<br>1       | 0<br>0       | 1<br>1       | 0<br>0.25 | 0<br>0 | 0<br>0 | 0<br>0    | 0<br>0    | 0<br>0       | 1<br>1 | 1<br>1 |
| <b>14. Recruitment</b><br>a. dates defining the periods of recruitment and follow-up<br>b. why the trial ended or was stopped                                                                                                                                                                | 0<br>0 | 1<br>1    | 0.75<br>0 | 0<br>0 | 0.75<br>0    | 0<br>0       | 0.75<br>0    | 0<br>0       | 1<br>0       | 0.75<br>0.25 | 0.75<br>0 | 0<br>0 | 0<br>0 | 0.5<br>0  | 0.25<br>0 | 0<br>0       | 0<br>0 | 1<br>0 |
| <b>15. Baseline data</b><br>a. a table showing baseline demographic and clinical characteristics for each group<br>b. systematic table of characteristics for each group                                                                                                                     | 0<br>0 | 1<br>1    | 1<br>0.25 | 1<br>1 | 0.75<br>0.75 |              | 0<br>0       | 1<br>1       | 0.75<br>0    | 1<br>1       | 1<br>1    | 0<br>0 | 0<br>0 | 1<br>0.75 | 1<br>0.75 | 0.75<br>0.75 | 0<br>0 | 1<br>1 |
| <b>16. Numbers analyzed</b><br>For each group, number of participants (denominator) included in each analysis and whether the analysis was by original assigned groups                                                                                                                       | 1      | 1         | 0.75      | 0      | 0.5          | 1            | 0.25         | 1            | 0.25         | 0.75         | 0.75      | 0      | 0      | 0.75      | 0.75      | 0.75         | 0      | 1      |
| <b>17. Outcomes and estimation</b><br>a. for each primary and secondary outcome, results for each group, and the estimated effect size and its precision (such as 95% confidence interval)<br>b. for binary outcomes, presentation of both absolute and relative effect sizes is recommended | 1<br>1 | 1<br>0.25 | 0.5<br>0  | 1<br>1 | 0.25<br>0    | 0.25<br>1    | 0.25<br>0    | 0.75<br>0.75 | 0<br>0       | 1<br>1       | 1<br>1    | 0<br>0 | 0<br>0 | 0<br>0    | 0<br>0    | 1<br>1       | 1<br>1 | 1<br>1 |
| <b>18. Ancillary analyses</b><br>Results of any other analyses performed, including subgroup analyses and adjusted analyses, distinguishing prespecified from exploratory                                                                                                                    | 0      | 1         | 0         | 0      | 0            | 0.75         | 0            | 0.75         | 0            | 0.25         | 0.75      | 0      | 0      | 0         | 0         | 0            | 0      | 0.75   |
| <b>19. Harms</b><br>All important harms or unintended effects in each group                                                                                                                                                                                                                  | 0      | 1         | 0         | 0      | 0            | 0            | 0            | 0            | 0            | 0            | 1         | 0      | 0      | 0         | 0         | 0            | 0      | 0      |
| <b>20. Limitations</b><br>Trial limitations, addressing sources of potential bias, imprecision, and, if relevant, multiplicity of analyses                                                                                                                                                   | 1      | 1         | 1         | 1      | 1            | 0.75         | 0.5          | 1            | 1            | 1            | 1         | 0      | 0      | 1         | 0.75      | 1            | 1      | 1      |
| <b>21. Generalizability</b><br>Generalizability (external validity, applicability) of the trial findings                                                                                                                                                                                     | 0      | 0.75      | 0.25      | 0      |              | 0.75         | 0.25         | 0.75         | 0            | 1            | 0.75      | 0      | 0      | 0         | 0.25      | 0            | 0      | 0.75   |

|                                                                                                                                            |    |    |   |    |      |   |      |    |      |    |    |   |   |      |      |      |    |      |
|--------------------------------------------------------------------------------------------------------------------------------------------|----|----|---|----|------|---|------|----|------|----|----|---|---|------|------|------|----|------|
| <b>22. Interpretation</b><br>Interpretation consistent with results, balancing benefits and harms, and considering other relevant evidence | 0  | 1  | 1 | 1  | 0.75 | 1 | 0.75 | 1  | 0.75 | 1  | 1  | 0 | 1 | 0.75 | 0.75 | 0.75 | 0  | 0.75 |
| <b>23. Registration</b><br>Registration number and name of trial registry                                                                  | 1  | 0  | 1 | 1  | 1    | 1 | 0    | 1  | 0    | 0  | 1  | 0 | 0 | 0    | 0    | 0    | 1  | 1    |
| <b>24. Protocol</b><br>Where the full trial protocol can be accessed, if available                                                         | 0  | 0  | 0 | 0  | 0    | 0 | 0    | 0  | 0    | 0  | 1  | 0 | 0 | 0    | 0    | 0    | 1  | 1    |
| <b>25. Funding</b><br>Sources of funding and other support (such as supply of drugs), role of funders                                      | 1  | 0  | 1 | 0  | 1    | 1 | 1    | 1  | 0    | 1  | 1  | 1 | 1 | 1    | 1    | 0    | 1  | 1    |
| <b>Numbers of criteria satisfied</b>                                                                                                       | 14 | 25 | 7 | 13 | 5    | 6 | 1    | 21 | 6    | 16 | 18 | 3 | 4 | 6    | 5    | 3    | 15 | 25   |

References:

1. Schulz KF, Altman DG, Moher D, CONSORT Group. CONSORT 2010 statement: updated guidelines for reporting parallel group randomised trials. PLoS Med 2010 Mar 24;7(3). doi: 10.1371/journal.pmed.1000251. Medline:20352064
